# Supplementary material for: Pulsed laser synthesis of free-standing Pt single atoms in an ice block for enhancing photocatalytic hydrogen evolution of g-C3N4
Source: Royal Society of Chemistry journal article supplement (doi:10.1039/d5na00043b), 2025-01-01
Supplement: d5na00043b1.pdf [file d5na00043b1.pdf]

**Pulsed laser synthesis of free-standing Pt single atoms in iced block for enhancing photocatalytic hydrogen evolution of g-C<sub>3</sub>N<sub>4</sub>**

Yongming Fu,<sup>\*ab</sup> Qianyu Lu,<sup>ab</sup> Jianhong Wang,<sup>ab</sup> Na Sun,<sup>ab</sup> Jinjun Gao,<sup>ab</sup> Peng Chen,<sup>ab</sup> Jizhou Wu<sup>abc</sup> and Jie Ma<sup>\*abc</sup>

<sup>a</sup> School of Physics and Electronic Engineering & Institute of Laser Spectroscopy, State Key Laboratory of Quantum Optics and Quantum Optics Devices, Shanxi University, Taiyuan 030006, China

<sup>b</sup> Xinzhou Institute of Innovation Ecosystem, Shanxi University, Xinzhou 034000, China

<sup>c</sup> Collaborative Innovation Center of Extreme Optics, Shanxi University, Taiyuan 030006, China

\* Corresponding authors. fuyongming@sxu.edu.cn; mj@sxu.edu.cn

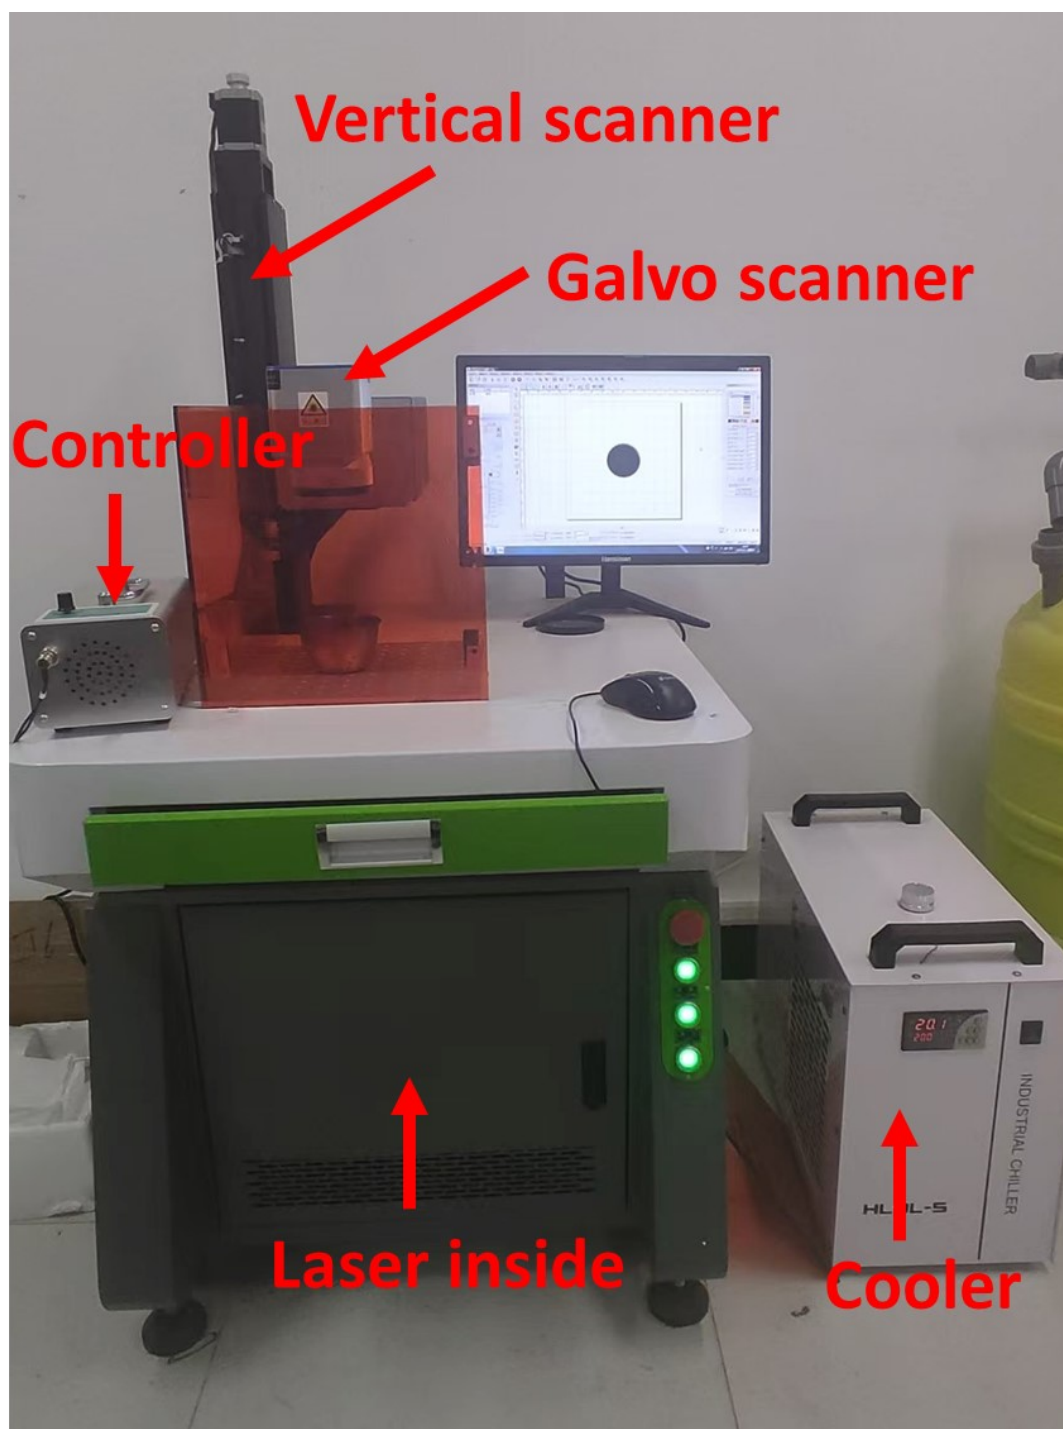

**Fig. S1** The photograph of the laser scanning set.

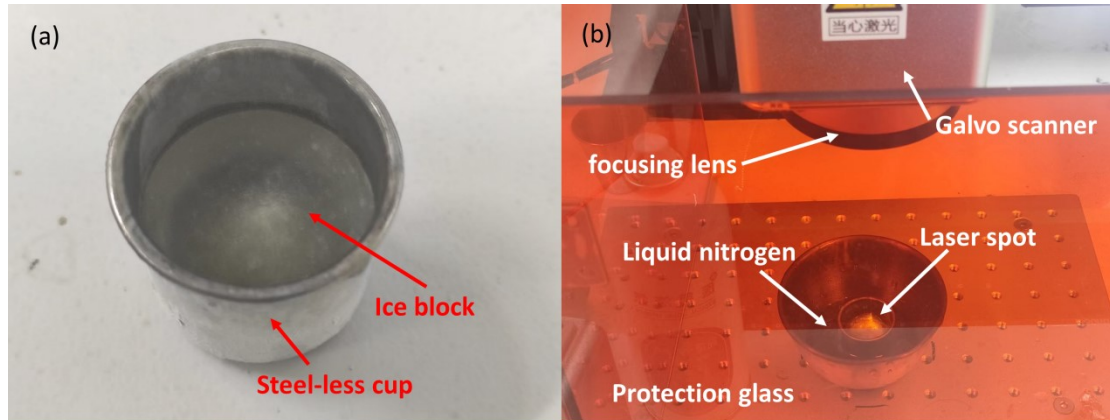

**Fig. S2** The photographs of ice block in stainless-steel cup (a) and laser scanning process (b).

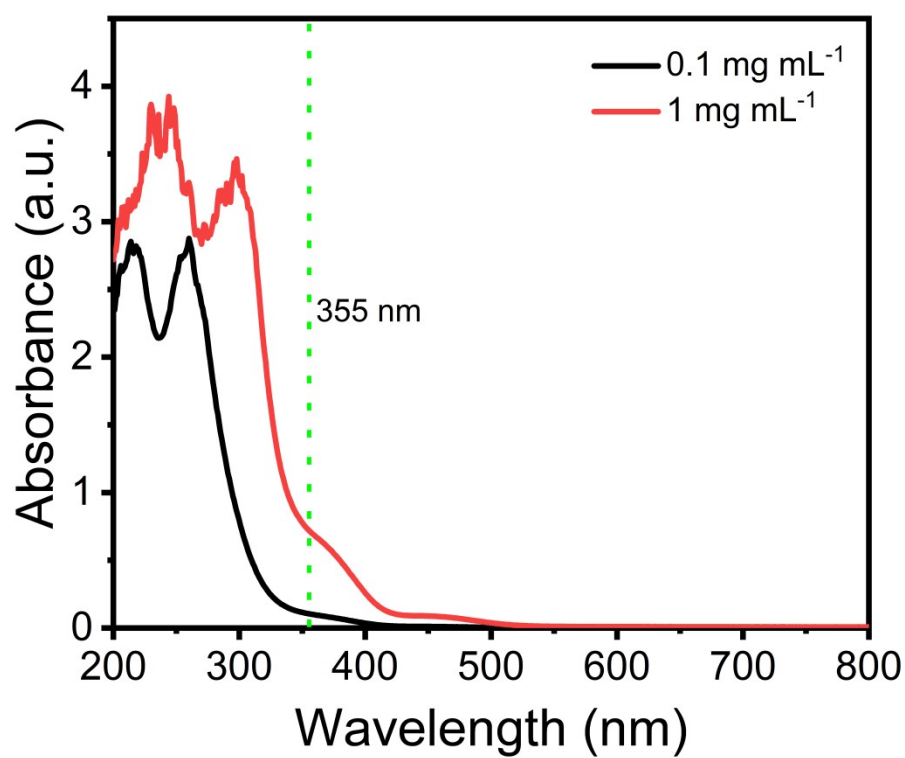

**Fig. S3** The absorbance of the ice blocks with different  $\text{H}_2\text{PtCl}_6$  concentrations.

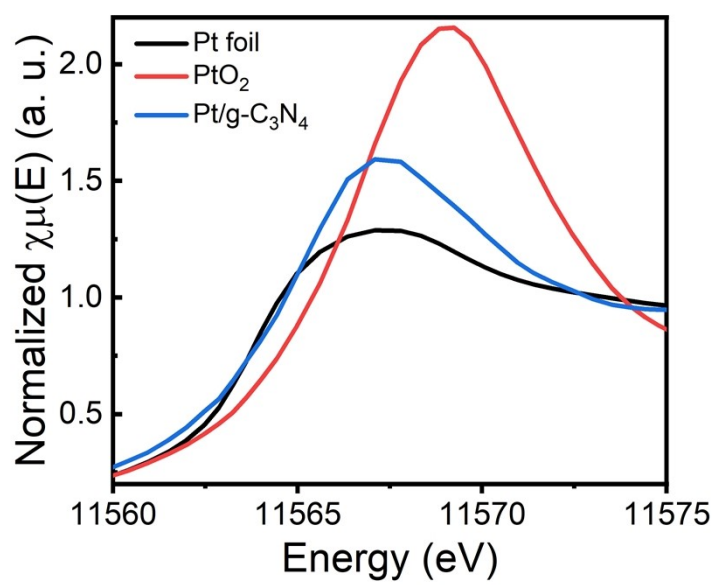

**Fig. S4** The enlarged view of EXNES spectra.

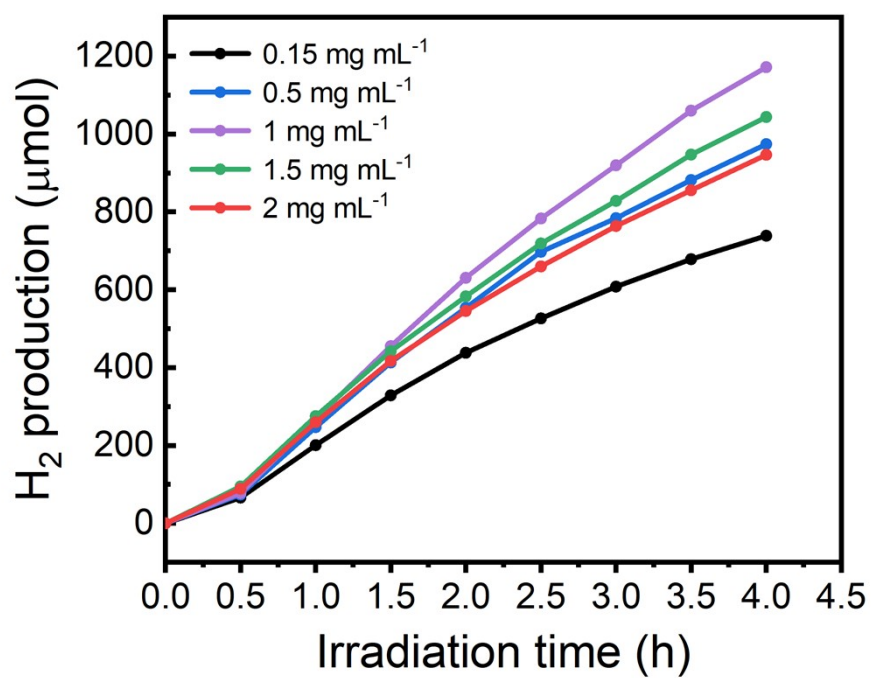

**Fig. S5** The photocatalytic hydrogen production of Pt/g-C<sub>3</sub>N<sub>4</sub> with different H<sub>2</sub>PtCl<sub>6</sub> concentration.

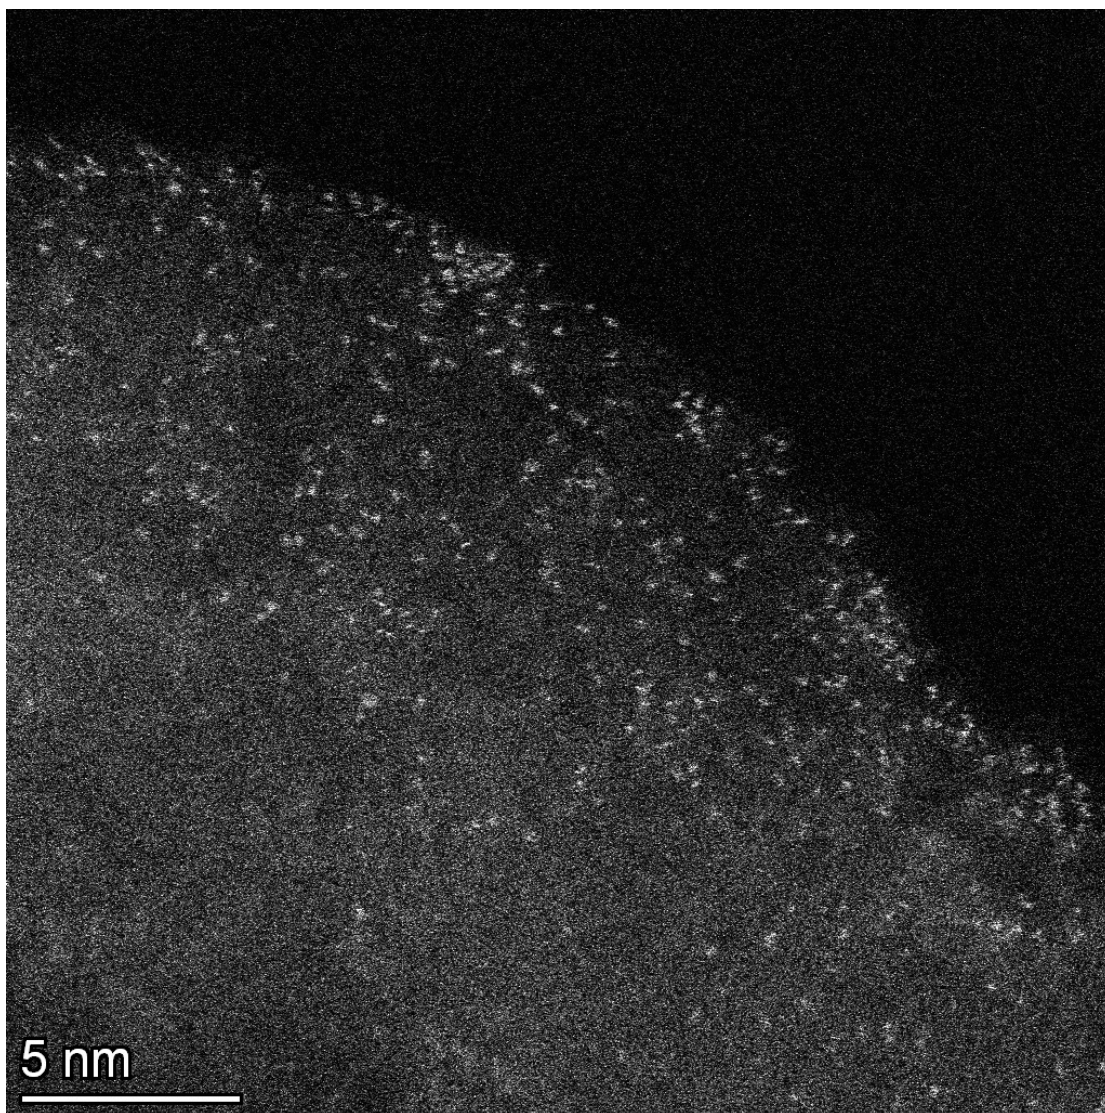

**Fig. S6** The HAADF-STEM image of Pt/g-C<sub>3</sub>N<sub>4</sub> after use.

**Table S1.** The precise fitting parameters of the EXAFS result.

| Sample                             | Bond type | CN      | R (Å)     | $\sigma^2$ ( $10^{-3}\text{\AA}^2$ ) | R factor |
|------------------------------------|-----------|---------|-----------|--------------------------------------|----------|
| Pt/g-C <sub>3</sub> N <sub>4</sub> | Pt-N      | 3.8±0.2 | 2.25±0.01 | 2.3±1.6                              | 0.012    |
| Pt foil                            | Pt-Pt     | 12      | 2.75±0.01 | 6.7±2.2                              | 0.006    |
| PtO <sub>2</sub>                   | Pt-O      | 5.9±1.2 | 2.03±0.01 | 1.9±1.6                              | 0.011    |

CN: coordination number.  $S_0^2$  was fixed to be 0.88 from Pt foil.

$\sigma^2$ : Debye–Waller factors
